# Supplementary material
Source: publisher figshare collection journal article supplement (https://acs.figshare.com/ndownloader/files/4478143)
Supplement: Supplementary file 1 [file 4478143]

## Supporting Information

# Synthesis of Biotinylated $\alpha$ -D-Mannoside or *N*-Acetyl $\beta$ -D-Glucosaminoside Decorated Gold Nanoparticles – Study of Their **Biomolecular** Recognition with Con A and WGA Lectins

Xiaoze Jiang,<sup>1</sup> Abdelghani Housni,<sup>1</sup> Guillaume Gody,<sup>2,3</sup> Paul Boullanger,<sup>3</sup>  
Marie-Thérèse Charreyre,<sup>2\*</sup> Thierry Delair,<sup>2</sup> and Ravin Narain<sup>1\*</sup>

**Materials.** All chemicals were purchased from Sigma-Aldrich or Acros Chemicals. EZ-Link™ Biotin PEO-Amine, ((+)-Biotinyl-3,6-dioxaoctanediamine, Pierce), and other materials were used without further purification.

**Synthesis of *N*-[8-((+)-biotinamido)-3,6-dioxaoctyl]-2-[[2-phenyl-1-thioxo]thio]-4-cyanopentanoate (BCBDBA).** The biotin-CTA (BCBDBA) was synthesized from a precursor RAFT agent, the succinimido-4-[[2-phenyl-1-thioxo]thio]-4-cyanopentanoate(1,2), and a commercial biotin derivative, EZ-Link™ Biotin PEO-Amine.

In a 100 mL round-bottomed flask equipped with a magnetic stirrer, the precursor RAFT agent (0.113 g, 0.300 mmol) was dissolved in chloroform (20 mL). A solution of EZ-Link™ Biotin PEO-Amine (0.112 g, 0.300 mmol) in 25 mL of chloroform was prepared. The latter was added dropwise to the solution of RAFT agent during 2 h at 30°C. Then, the organic phase was washed five times with 60 mL of distilled water

and dried over anhydrous magnesium sulfate. After solvent removal, a column chromatography (Silica gel 60, Merk) was performed (dichloromethane/ethanol: 90/10 v/v) to afford a very viscous red oil (0,093 g, yield 49%).

Fast Atom Bombardment (FAB) mass spectrometry: characteristic ion  $[M + Na^+]$ :  $C_{29}H_{41}N_5NaO_5S_3$ ; calculated 658.22; found 658.21.

$^1H$  NMR 500MHz ( $CDCl_3$ , RT, ppm) (see structure below for proton assignment): 7.90 (2 H, d,  $H_{19}$ ); 7.55 (1 H, dd,  $H_{21}$ ); 7.39 (2 H, dd,  $H_{20}$ ); 7.11 (1 H, t,  $H_2$ ); 6.61 (1 H, t,  $H_3$ ); 6.36 (1 H, d,  $H_\beta$ ); 5,37 (1 H, s,  $H_\alpha$ ); 4.47, 4.30 (2 H, ddd,  $H_2$  and  $H_3$ ); 3.64-3.43 (12 H, m, from  $H_{10}$  to  $H_{15}$ ); 3.13 (1 H, dt,  $H_4$ ); 2.88 (1 H, ddd,  $H_1$ ); 2.72 (1 H, dd,  $H_5$ ); 2.58 (2 H, t,  $H_{16}$ ); 2.42 (2 H, t,  $H_{17}$ ); 2.22 (2 H, t,  $H_9$ ); 1.94 (3 H, s,  $H_{18}$ ); 1.71-1.64 (4 H, m,  $H_7$  and  $H_8$ ); 1.44 (2 H, dt,  $H_6$ ).

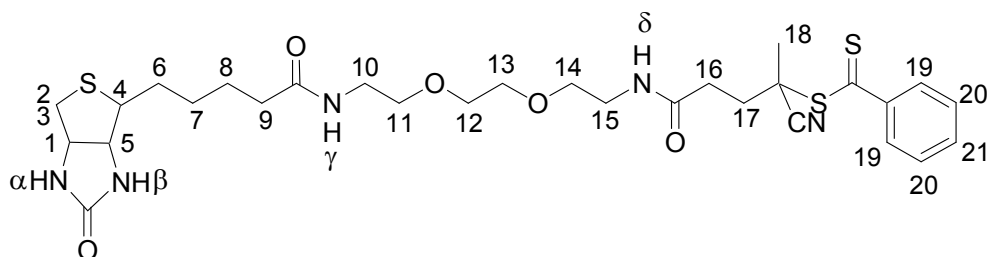

## References.

- (1) Bathfield, M., D'Agosto, F., Spitz, R., Charreyre, M.-T., and Delair, T. (2006)  
Versatile precursors of functional RAFT agents. application to the synthesis of  
bio-related end-functionalized polymers. *J. Am. Chem. Soc.* 128, 2546-2547.
- (2) Gody, G., Boullanger, P., Ladavière, C., Charreyre, M.-T., and Delair, T. (2008)  
Biotin  $\alpha$ -end-functionalized gradient glycopolymers synthesized by RAFT  
copolymerization. *Macromol. Rapid Commun.* 29, 511-519.

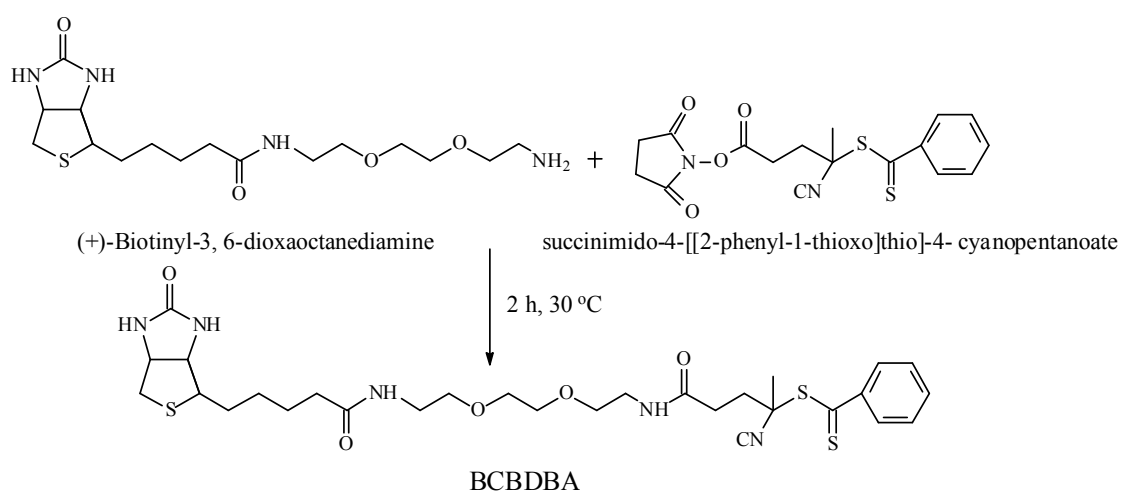

**Figure S1.** Synthetic route to the preparation of *N*-[8-((+)-biotinamido)-3,6-dioxaoctyl]-2-[[2-phenyl-1-thioxo]thio]-4-cyanopentanoate (BCBDBA).

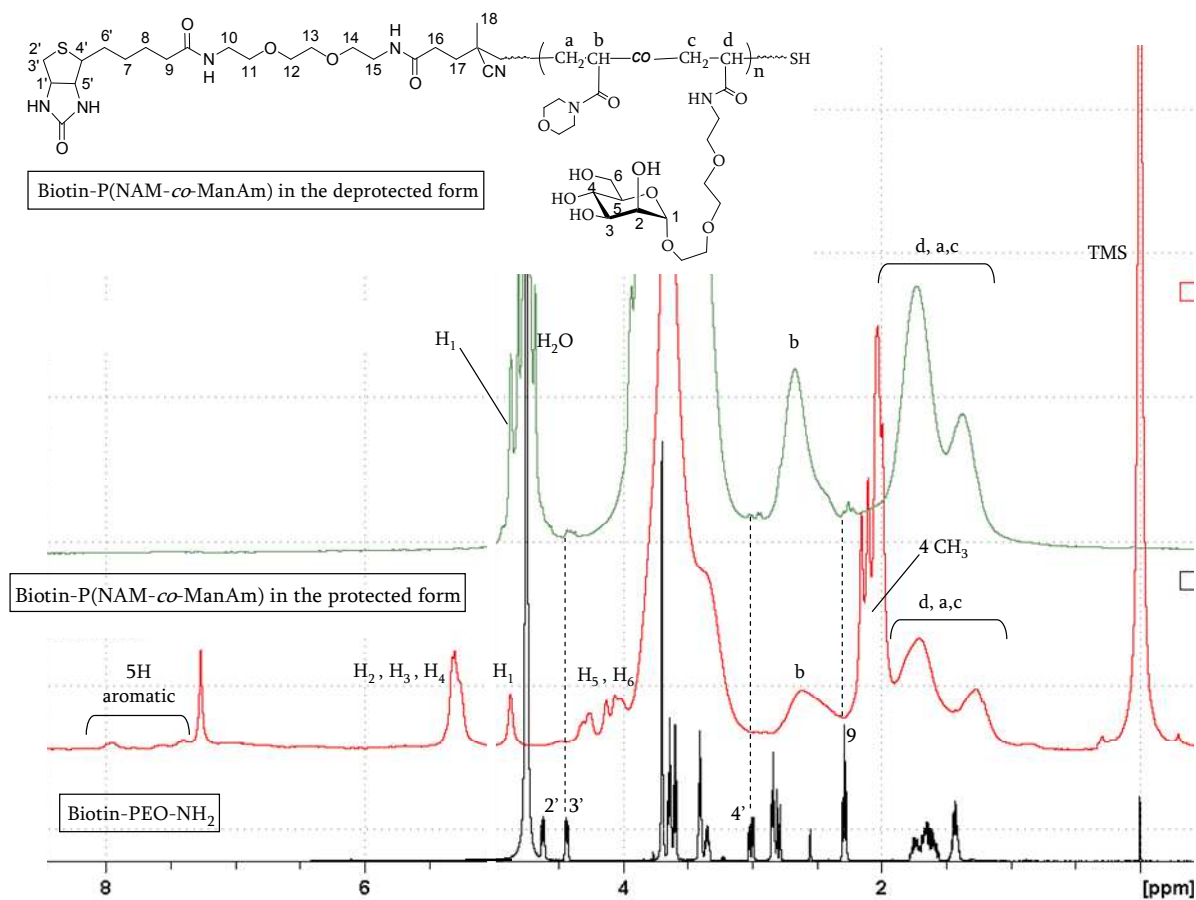

**Figure S2.** Comparison of the NMR spectra before ( $CDCl_3$ ) and after ( $D_2O$ ) deprotection of the P(NAM-co-ManAm) copolymer with that of Biotin-PEO-amine ( $D_2O$ ).
